# Supplementary material
Source: PubMed Central journal article supplement (PMC6959519)
Supplement: NIHMS1066240-supplement-suppl_txt.pdf [file NIHMS1066240-supplement-suppl_txt.pdf]

```

data_global
_journal_name_full          Chem.Commun.

_journal_codен_Cambridge    0182
_journal_volume             ?
_journal_page_first        ?
_journal_year               ?

_publ_contact_author_name   'Debanjan Biswas'
_publ_contact_author_email  biswasd@mail.nih.gov

_publ_section_title
;
Nitrogen-bound Diazeniumdiolated Amidines
;
loop_
_publ_author_name
'Debanjan Biswas'
'Jeffrey Deschamps'
'Larry Keefer'
'Joseph Hrabie'

# Attachment 'Amidine-Crystal-Data.cif.txt'

#=====
data_4
_database_code_depnum_ccdc_archive 'CCDC 761561'
#TrackingRef 'Amidine-Crystal-Data.cif.txt'

_audit_creation_method      SHELXL-97
_chemical_name_systematic
;
?
;
_chemical_name_common       ?
_chemical_melting_point     ?
_chemical_formula_moiety    'C8 H10 N4 O2'
_chemical_formula_sum       'C8 H10 N4 O2'
_chemical_formula_weight    194.20

loop_
_atom_type_symbol
_atom_type_description
_atom_type_scат_dispersion_real
_atom_type_scат_dispersion_imag
_atom_type_scат_source
C C 0.0033 0.0016 'International Tables Vol C Tables 4.2.6.8 and 6.1.1.4'
H H 0.0000 0.0000 'International Tables Vol C Tables 4.2.6.8 and 6.1.1.4'
N N 0.0061 0.0033 'International Tables Vol C Tables 4.2.6.8 and 6.1.1.4'
O O 0.0106 0.0060 'International Tables Vol C Tables 4.2.6.8 and 6.1.1.4'

_symmetry_cell_setting      orthorhombic
_symmetry_space_group_name_H-M Pbca

loop_
_symmetry_equiv_pos_as_xyz
'x, y, z'
'-x+1/2, -y, z+1/2'
'-x, y+1/2, -z+1/2'
'x+1/2, -y+1/2, -z'
'-x, -y, -z'

```

'x-1/2, y, -z-1/2'  
'x, -y-1/2, z-1/2'  
'-x-1/2, y-1/2, z'

\_cell\_length\_a 9.8141(5)  
\_cell\_length\_b 11.4621(7)  
\_cell\_length\_c 17.6029(9)  
\_cell\_angle\_alpha 90.00  
\_cell\_angle\_beta 90.00  
\_cell\_angle\_gamma 90.00  
\_cell\_volume 1980.15(19)  
\_cell\_formula\_units\_Z 8  
\_cell\_measurement\_temperature 294(2)  
\_cell\_measurement\_reflms\_used 5886  
\_cell\_measurement\_theta\_min 2.31  
\_cell\_measurement\_theta\_max 25.82

\_exptl\_crystal\_description prisim  
\_exptl\_crystal\_colour colourless  
\_exptl\_crystal\_size\_min 0.107  
\_exptl\_crystal\_size\_mid 0.144  
\_exptl\_crystal\_size\_max 0.551  
\_exptl\_crystal\_density\_meas ?  
\_exptl\_crystal\_density\_diffrn 1.303  
\_exptl\_crystal\_density\_method 'not measured'  
\_exptl\_crystal\_F\_000 816  
\_exptl\_absorpt\_coefficient\_mu 0.098

#####

# #  
# NOTE on absorbtion correction with SADABS: #  
# #  
# (Semi)empirical correction methods for absorption correction are more of #  
# a problem in that they often specify only a relative correction range #  
# [ Tmin(emp) & Tmax(emp)]. #  
# #  
# Acta Cryst. procedures call in such cases for the multiplication of both #  
# empirical values with Tmax(expected). #  
# #  
# THIS RECOMMENDATION IS CURRENTLY UNDER REVIEW! (George #  
# and Ton are agruing this point!) #  
# #

#####

\_exptl\_absorpt\_correction\_type multi-scan  
\_exptl\_absorpt\_process\_details 'SADABS v2.10 (Bruker, 2000c)'  
\_exptl\_absorpt\_correction\_T\_min 0.9482  
\_exptl\_absorpt\_correction\_T\_max 0.9896

\_exptl\_special\_details  
;  
?  
;

\_diffrn\_ambient\_temperature 294(2)  
# SMART APEX II parameters  
\_diffrn\_radiation\_wavelength 0.71073  
\_diffrn\_radiation\_type MoK\alpha  
\_diffrn\_radiation\_source 'fine-focus sealed tube'  
\_diffrn\_radiation\_monochromator graphite  
\_diffrn\_measurement\_device\_type 'Bruker SMART APEX II CCD'  
\_diffrn\_measurement\_method '\w scans'  
\_diffrn\_detector\_area\_resol\_mean ?  
\_diffrn\_reflms\_number 19608

```

_diffrn_reflms_av_R_equivalents 0.0195
_diffrn_reflms_av_sigmaI/netI 0.0112
_diffrn_reflms_limit_h_min -13
_diffrn_reflms_limit_h_max 11
_diffrn_reflms_limit_k_min -15
_diffrn_reflms_limit_k_max 15
_diffrn_reflms_limit_l_min -23
_diffrn_reflms_limit_l_max 23
_diffrn_reflms_theta_min 2.31
_diffrn_reflms_theta_max 28.37
_reflms_number_total 2462
_reflms_number_gt 1910
_reflms_threshold_expression I>2\s(I)

_computing_data_collection 'Bruker SMART v5.631 (Bruker, 2001)'
_computing_cell_refinement 'Bruker SMART v5.631 (Bruker, 2001)'
_computing_data_reduction
;
Bruker SAINT v6.45A (Bruker, 2002), Bruker XPREP v6.14 (Bruker, 2001)
;
_computing_structure_solution 'Bruker SHELXTL v6.14 (Bruker, 2000b)'
_computing_structure_refinement 'Bruker SHELXTL v6.14 (Bruker, 2000b)'
_computing_molecular_graphics 'Bruker SHELXTL v6.14 (Bruker, 2000b)'
_computing_publication_material 'Bruker SHELXTL v6.14 (Bruker, 2000b)'

_refine_special_details
;
Refinement of F2 against ALL reflections. The weighted R-factor wR and
goodness of fit S are based on F2, conventional R-factors R are based
on F, with F set to zero for negative F2. The threshold expression of
F2 > 2sigma(F2) is used only for calculating R-factors(gt) etc. and is
not relevant to the choice of reflections for refinement. R-factors based
on F2 are statistically about twice as large as those based on F, and R-
factors based on ALL data will be even larger.
;

_refine_ls_structure_factor_coef Fsqd
_refine_ls_matrix_type full
_refine_ls_weighting_scheme calc
_refine_ls_weighting_details
'calc w=1/[\s^2^(Fo^2)+(0.0585P)^2+0.2819P] where P=(Fo^2+2Fc^2)/3'
_atom_sites_solution_primary direct
_atom_sites_solution_secondary difmap
_atom_sites_solution_hydrogens geom
_refine_ls_hydrogen_treatment mixed
_refine_ls_extinction_method none
_refine_ls_extinction_coef ?
_refine_ls_number_reflms 2462
_refine_ls_number_parameters 134
_refine_ls_number_restraints 0
_refine_ls_R_factor_all 0.0503
_refine_ls_R_factor_gt 0.0388
_refine_ls_wR_factor_ref 0.1186
_refine_ls_wR_factor_gt 0.1086
_refine_ls_goodness_of_fit_ref 1.029
_refine_ls_restrained_S_all 1.029
_refine_ls_shift/su_max 0.000
_refine_ls_shift/su_mean 0.000

loop_
_atom_site_label
_atom_site_type_symbol

```

```

_atom_site_fract_x
_atom_site_fract_y
_atom_site_fract_z
_atom_site_U_iso_or_equiv
_atom_site_adp_type
_atom_site_occupancy
_atom_site_symmetry_multiplicity
_atom_site_calc_flag
_atom_site_refinement_flags
_atom_site_disorder_assembly
_atom_site_disorder_group
N1 N 0.16413(10) 0.24839(9) 0.11856(5) 0.0498(3) Uani 1 1 d . . .
O1 O 0.23757(10) 0.29498(10) 0.06832(6) 0.0714(3) Uani 1 1 d . . .
N2 N 0.20244(12) 0.16960(10) 0.16465(6) 0.0593(3) Uani 1 1 d . . .
N3 N 0.03072(10) 0.28617(9) 0.13396(5) 0.0516(3) Uani 1 1 d . . .
O2 O 0.33715(10) 0.14482(10) 0.14812(6) 0.0712(3) Uani 1 1 d . . .
C3 C 0.3848(2) 0.05895(17) 0.20119(12) 0.1006(7) Uani 1 1 d . . .
H3A H 0.4734 0.0322 0.1860 0.151 Uiso 1 1 calc R . .
H3B H 0.3227 -0.0057 0.2021 0.151 Uiso 1 1 calc R . .
H3C H 0.3902 0.0930 0.2509 0.151 Uiso 1 1 calc R . .
C1' C -0.04200(12) 0.31006(9) 0.07380(6) 0.0468(3) Uani 1 1 d . . .
N1' N -0.00626(14) 0.30174(12) 0.00115(6) 0.0634(3) Uani 1 1 d . . .
H1'A H 0.078(2) 0.2831(17) -0.0098(11) 0.095 Uiso 1 1 d . . .
H2'B H -0.073(2) 0.2994(17) -0.0327(12) 0.095 Uiso 1 1 d . . .
C2' C -0.18176(12) 0.35294(10) 0.09034(6) 0.0489(3) Uani 1 1 d . . .
C3' C -0.25944(14) 0.30218(12) 0.14735(7) 0.0589(3) Uani 1 1 d . . .
H3'A H -0.2242 0.2405 0.1755 0.071 Uiso 1 1 calc R . .
C4' C -0.38923(15) 0.34327(15) 0.16238(8) 0.0710(4) Uani 1 1 d . . .
H4'A H -0.4417 0.3085 0.2001 0.085 Uiso 1 1 calc R . .
C5' C -0.44078(16) 0.43565(15) 0.12151(10) 0.0770(5) Uani 1 1 d . . .
H5'A H -0.5280 0.4632 0.1317 0.092 Uiso 1 1 calc R . .
C6' C -0.36325(17) 0.48747(14) 0.06544(10) 0.0736(4) Uani 1 1 d . . .
H6'A H -0.3979 0.5506 0.0385 0.088 Uiso 1 1 calc R . .
C7' C -0.23470(15) 0.44597(11) 0.04926(8) 0.0613(3) Uani 1 1 d . . .
H7'A H -0.1834 0.4802 0.0109 0.074 Uiso 1 1 calc R . .

```

loop\_

```

_atom_site_aniso_label
_atom_site_aniso_U_11
_atom_site_aniso_U_22
_atom_site_aniso_U_33
_atom_site_aniso_U_23
_atom_site_aniso_U_13
_atom_site_aniso_U_12
N1 0.0501(6) 0.0551(5) 0.0443(5) -0.0007(4) -0.0019(4) 0.0018(4)
O1 0.0521(5) 0.0906(7) 0.0715(6) 0.0250(5) 0.0068(4) 0.0017(5)
N2 0.0618(7) 0.0630(6) 0.0530(6) 0.0036(5) -0.0011(5) 0.0108(5)
N3 0.0491(6) 0.0601(6) 0.0455(5) 0.0002(4) -0.0004(4) 0.0052(4)
O2 0.0647(6) 0.0845(7) 0.0644(6) 0.0047(5) -0.0041(4) 0.0248(5)
C3 0.1171(16) 0.0898(12) 0.0949(13) 0.0083(10) -0.0112(11) 0.0518(11)
C1' 0.0497(6) 0.0449(6) 0.0457(6) -0.0012(4) -0.0004(5) -0.0037(5)
N1' 0.0524(6) 0.0925(9) 0.0452(6) -0.0025(5) -0.0018(5) 0.0025(6)
C2' 0.0503(6) 0.0488(6) 0.0476(6) -0.0050(5) -0.0035(5) 0.0010(5)
C3' 0.0586(7) 0.0667(8) 0.0513(6) 0.0001(6) 0.0028(5) 0.0050(6)
C4' 0.0587(8) 0.0919(11) 0.0624(8) -0.0144(7) 0.0090(6) 0.0022(7)
C5' 0.0579(8) 0.0883(11) 0.0848(10) -0.0315(9) -0.0099(8) 0.0208(8)
C6' 0.0737(10) 0.0606(8) 0.0864(10) -0.0091(7) -0.0194(8) 0.0175(7)
C7' 0.0643(8) 0.0522(7) 0.0672(8) 0.0020(6) -0.0083(6) 0.0022(6)

```

\_geom\_special\_details

```

;
All esds (except the esd in the dihedral angle between two l.s. planes)

```

are estimated using the full covariance matrix. The cell esds are taken into account individually in the estimation of esds in distances, angles and torsion angles; correlations between esds in cell parameters are only used when they are defined by crystal symmetry. An approximate (isotropic) treatment of cell esds is used for estimating esds involving l.s. planes.  
;

```

loop_
  _geom_bond_atom_site_label_1
  _geom_bond_atom_site_label_2
  _geom_bond_distance
  _geom_bond_site_symmetry_2
  _geom_bond_publ_flag
N1 O1 1.2595(13) . ?
N1 N2 1.2709(14) . ?
N1 N3 1.4055(14) . ?
N2 O2 1.3831(15) . ?
N3 C1' 1.3060(15) . ?
O2 C3 1.4354(19) . ?
C3 H3A 0.9600 . ?
C3 H3B 0.9600 . ?
C3 H3C 0.9600 . ?
C1' N1' 1.3294(16) . ?
C1' C2' 1.4858(17) . ?
N1' H1'A 0.88(2) . ?
N1' H2'B 0.89(2) . ?
C2' C3' 1.3881(18) . ?
C2' C7' 1.3892(17) . ?
C3' C4' 1.3836(19) . ?
C3' H3'A 0.9300 . ?
C4' C5' 1.377(2) . ?
C4' H4'A 0.9300 . ?
C5' C6' 1.381(2) . ?
C5' H5'A 0.9300 . ?
C6' C7' 1.378(2) . ?
C6' H6'A 0.9300 . ?
C7' H7'A 0.9300 . ?

```

```

loop_
  _geom_angle_atom_site_label_1
  _geom_angle_atom_site_label_2
  _geom_angle_atom_site_label_3
  _geom_angle
  _geom_angle_site_symmetry_1
  _geom_angle_site_symmetry_3
  _geom_angle_publ_flag
O1 N1 N2 125.46(10) . . ?
O1 N1 N3 122.54(10) . . ?
N2 N1 N3 111.80(10) . . ?
N1 N2 O2 107.12(10) . . ?
C1' N3 N1 114.66(10) . . ?
N2 O2 C3 108.40(12) . . ?
O2 C3 H3A 109.5 . . ?
O2 C3 H3B 109.5 . . ?
H3A C3 H3B 109.5 . . ?
O2 C3 H3C 109.5 . . ?
H3A C3 H3C 109.5 . . ?
H3B C3 H3C 109.5 . . ?
N3 C1' N1' 128.37(12) . . ?
N3 C1' C2' 114.51(10) . . ?
N1' C1' C2' 117.12(11) . . ?
C1' N1' H1'A 118.5(13) . . ?

```

C1' N1' H2'B 116.9(12) . . ?  
 H1'A N1' H2'B 123.0(18) . . ?  
 C3' C2' C7' 119.52(12) . . ?  
 C3' C2' C1' 120.66(11) . . ?  
 C7' C2' C1' 119.81(11) . . ?  
 C4' C3' C2' 120.07(13) . . ?  
 C4' C3' H3'A 120.0 . . ?  
 C2' C3' H3'A 120.0 . . ?  
 C5' C4' C3' 120.02(15) . . ?  
 C5' C4' H4'A 120.0 . . ?  
 C3' C4' H4'A 120.0 . . ?  
 C4' C5' C6' 120.13(14) . . ?  
 C4' C5' H5'A 119.9 . . ?  
 C6' C5' H5'A 119.9 . . ?  
 C7' C6' C5' 120.25(14) . . ?  
 C7' C6' H6'A 119.9 . . ?  
 C5' C6' H6'A 119.9 . . ?  
 C6' C7' C2' 119.98(14) . . ?  
 C6' C7' H7'A 120.0 . . ?  
 C2' C7' H7'A 120.0 . . ?

loop\_

\_geom\_torsion\_atom\_site\_label\_1  
 \_geom\_torsion\_atom\_site\_label\_2  
 \_geom\_torsion\_atom\_site\_label\_3  
 \_geom\_torsion\_atom\_site\_label\_4  
 \_geom\_torsion  
 \_geom\_torsion\_site\_symmetry\_1  
 \_geom\_torsion\_site\_symmetry\_2  
 \_geom\_torsion\_site\_symmetry\_3  
 \_geom\_torsion\_site\_symmetry\_4  
 \_geom\_torsion\_publ\_flag  
 O1 N1 N2 O2 -0.84(16) . . . . ?  
 N3 N1 N2 O2 -175.79(9) . . . . ?  
 O1 N1 N3 C1' 41.94(15) . . . . ?  
 N2 N1 N3 C1' -142.94(11) . . . . ?  
 N1 N2 O2 C3 177.92(12) . . . . ?  
 N1 N3 C1' N1' 0.89(18) . . . . ?  
 N1 N3 C1' C2' -178.47(9) . . . . ?  
 N3 C1' C2' C3' -41.56(16) . . . . ?  
 N1' C1' C2' C3' 139.00(13) . . . . ?  
 N3 C1' C2' C7' 137.40(12) . . . . ?  
 N1' C1' C2' C7' -42.04(16) . . . . ?  
 C7' C2' C3' C4' 0.77(19) . . . . ?  
 C1' C2' C3' C4' 179.73(12) . . . . ?  
 C2' C3' C4' C5' -0.9(2) . . . . ?  
 C3' C4' C5' C6' 0.0(2) . . . . ?  
 C4' C5' C6' C7' 1.0(2) . . . . ?  
 C5' C6' C7' C2' -1.1(2) . . . . ?  
 C3' C2' C7' C6' 0.25(19) . . . . ?  
 C1' C2' C7' C6' -178.73(12) . . . . ?

loop\_

\_geom\_hbond\_atom\_site\_label\_D  
 \_geom\_hbond\_atom\_site\_label\_H  
 \_geom\_hbond\_atom\_site\_label\_A  
 \_geom\_hbond\_distance\_DH  
 \_geom\_hbond\_distance\_HA  
 \_geom\_hbond\_distance\_DA  
 \_geom\_hbond\_angle\_DHA  
 \_geom\_hbond\_site\_symmetry\_A  
 N1' H1'A O1 0.88(2) 2.09(2) 2.6703(17) 123.2(16) .

N1' H2'B O1 0.89(2) 2.24(2) 3.0075(17) 144.8(17) 4\_455

N1' H2'B O2 0.89(2) 2.30(2) 3.1051(16) 150.0(17) 4\_455

\_diffn\_measured\_fraction\_theta\_max 0.997  
 \_diffn\_reflns\_theta\_full 25.00  
 \_diffn\_measured\_fraction\_theta\_full 1.000  
 \_refine\_diff\_density\_max 0.149  
 \_refine\_diff\_density\_min -0.146  
 \_refine\_diff\_density\_rms 0.028

#=====

data\_9

\_database\_code\_depnum\_ccdc\_archive 'CCDC 761562'

#TrackingRef 'Amidine-Crystal-Data.cif.txt'

\_audit\_creation\_method SHELXL-97  
 \_chemical\_name\_systematic  
 ;  
 ?  
 ;  
 \_chemical\_name\_common ?  
 \_chemical\_melting\_point ?  
 \_chemical\_formula\_moiety 'C16 H18 N4 O2'  
 \_chemical\_formula\_sum 'C16 H18 N4 O2'  
 \_chemical\_formula\_weight 298.34

loop\_

\_atom\_type\_symbol  
 \_atom\_type\_description  
 \_atom\_type\_scatter\_dispersion\_real  
 \_atom\_type\_scatter\_dispersion\_imag  
 \_atom\_type\_scatter\_source  
 C C 0.0033 0.0016 'International Tables Vol C Tables 4.2.6.8 and 6.1.1.4'  
 H H 0.0000 0.0000 'International Tables Vol C Tables 4.2.6.8 and 6.1.1.4'  
 N N 0.0061 0.0033 'International Tables Vol C Tables 4.2.6.8 and 6.1.1.4'  
 O O 0.0106 0.0060 'International Tables Vol C Tables 4.2.6.8 and 6.1.1.4'

\_symmetry\_cell\_setting orthorhombic  
 \_symmetry\_space\_group\_name\_H-M Pbca

loop\_

\_symmetry\_equiv\_pos\_as\_xyz  
 'x, y, z'  
 'x+1/2, -y+1/2, -z'  
 '-x, y+1/2, -z+1/2'  
 '-x+1/2, -y, z+1/2'  
 '-x, -y, -z'  
 '-x-1/2, y-1/2, z'  
 'x, -y-1/2, z-1/2'  
 'x-1/2, y, -z-1/2'

\_cell\_length\_a 9.9137(7)  
 \_cell\_length\_b 13.7220(10)  
 \_cell\_length\_c 22.4918(16)  
 \_cell\_angle\_alpha 90.00  
 \_cell\_angle\_beta 90.00  
 \_cell\_angle\_gamma 90.00  
 \_cell\_volume 3059.7(4)  
 \_cell\_formula\_units\_Z 8  
 \_cell\_measurement\_temperature 100(2)  
 \_cell\_measurement\_reflns\_used 8050  
 \_cell\_measurement\_theta\_min 2.69

```

_cell_measurement_theta_max      29.13

_exptl_crystal_description       block
_exptl_crystal_colour           colorless
_exptl_crystal_size_min         0.275
_exptl_crystal_size_mid         0.337
_exptl_crystal_size_max         0.488
_exptl_crystal_density_meas     ?
_exptl_crystal_density_diffrn   1.295
_exptl_crystal_density_method   'not measured'
_exptl_crystal_F_000            1264
_exptl_absorpt_coefficient_mu   0.089
#####
# #
# NOTE on absorbtion correction with SADABS: #
# #
# (Semi)empirical correction methods for absorption correction are more of #
# a problem in that they often specify only a relative correction range #
# [ Tmin(emp) & Tmax(emp)]. #
# #
# Acta Cryst. procedures call in such cases for the multiplication of both #
# empirical values with Tmax(expected). #
# #
# THIS RECOMMENDATION IS CURRENTLY UNDER REVIEW! (George #
# and Ton are agruing this point!) #
# #
#####
_exptl_absorpt_correction_type   multi-scan
_exptl_absorpt_process_details   'SADABS v2.10 (Bruker, 2000c)'
_exptl_absorpt_correction_T_min  0.9581
_exptl_absorpt_correction_T_max  0.9761

_exptl_special_details
;
?
;

_diffrn_ambient_temperature     100(2)
# SMART APEX II parameters
_diffrn_radiation_wavelength     0.71073
_diffrn_radiation_type           MoK\alpha
_diffrn_radiation_source         'fine-focus sealed tube'
_diffrn_radiation_monochromator   graphite
_diffrn_measurement_device_type   'Bruker SMART APEX II CCD'
_diffrn_measurement_method       '\w scans'
_diffrn_detector_area_resol_mean  ?
_diffrn_reflns_number            25385
_diffrn_reflns_av_R_equivalents  0.0263
_diffrn_reflns_av_sigmaI/netI    0.0178
_diffrn_reflns_limit_h_min       -12
_diffrn_reflns_limit_h_max       13
_diffrn_reflns_limit_k_min       -18
_diffrn_reflns_limit_k_max       18
_diffrn_reflns_limit_l_min       -27
_diffrn_reflns_limit_l_max       30
_diffrn_reflns_theta_min         1.81
_diffrn_reflns_theta_max         29.17
_reflns_number_total             4131
_reflns_number_gt                3516
_reflns_threshold_expression      I>2\s(I)

_computing_data_collection       'Bruker SMART v5.631 (Bruker, 2001)'
```



```

_computing_cell_refinement      'Bruker SMART v5.631 (Bruker, 2001)'
_computing_data_reduction
;
Bruker SAINT v6.45A (Bruker, 2002), Bruker XPREP v6.14 (Bruker, 2001)
;
_computing_structure_solution  'Bruker SHELXTL v6.14 (Bruker, 2000b)'
_computing_structure_refinement 'Bruker SHELXTL v6.14 (Bruker, 2000b)'
_computing_molecular_graphics  'Bruker SHELXTL v6.14 (Bruker, 2000b)'
_computing_publication_material 'Bruker SHELXTL v6.14 (Bruker, 2000b)'

_refine_special_details
;
Refinement of F2 against ALL reflections. The weighted R-factor wR and
goodness of fit S are based on F2, conventional R-factors R are based
on F, with F set to zero for negative F2. The threshold expression of
F2 > 2sigma(F2) is used only for calculating R-factors(gt) etc. and is
not relevant to the choice of reflections for refinement. R-factors based
on F2 are statistically about twice as large as those based on F, and R-
factors based on ALL data will be even larger.
;

_refine_ls_structure_factor_coef Fsqd
_refine_ls_matrix_type         full
_refine_ls_weighting_scheme    calc
_refine_ls_weighting_details
'calc w=1/[\s^2^(Fo^2)+(0.0596P)^2+0.7787P] where P=(Fo^2+2Fc^2)/3'
_atom_sites_solution_primary   direct
_atom_sites_solution_secondary difmap
_atom_sites_solution_hydrogens geom
_refine_ls_hydrogen_treatment constr
_refine_ls_extinction_method   none
_refine_ls_extinction_coef     ?
_refine_ls_number_reflns      4131
_refine_ls_number_parameters   201
_refine_ls_number_restraints   0
_refine_ls_R_factor_all        0.0444
_refine_ls_R_factor_gt         0.0373
_refine_ls_wR_factor_ref       0.1084
_refine_ls_wR_factor_gt        0.1032
_refine_ls_goodness_of_fit_ref 1.043
_refine_ls_restrained_S_all    1.043
_refine_ls_shift/su_max        0.000
_refine_ls_shift/su_mean       0.000

loop_
_atom_site_label
_atom_site_type_symbol
_atom_site_fract_x
_atom_site_fract_y
_atom_site_fract_z
_atom_site_U_iso_or_equiv
_atom_site_adp_type
_atom_site_occupancy
_atom_site_symmetry_multiplicity
_atom_site_calc_flag
_atom_site_refinement_flags
_atom_site_disorder_assembly
_atom_site_disorder_group
N1 N 0.53139(8) -0.09689(5) 0.36447(4) 0.01579(17) Uani 1 1 d . . .
O1 O 0.63318(7) -0.09296(5) 0.39774(3) 0.02145(16) Uani 1 1 d . . .
N2 N 0.52967(8) -0.10581(6) 0.30791(4) 0.01739(18) Uani 1 1 d . . .
O2 O 0.66272(7) -0.10869(5) 0.28834(3) 0.01998(16) Uani 1 1 d . . .

```

N3 N 0.39993(8) -0.09989(6) 0.38856(4) 0.01741(17) Uani 1 1 d . . .  
 C3 C 0.65802(11) -0.10615(7) 0.22374(5) 0.0215(2) Uani 1 1 d . . .  
 H3B H 0.6102 -0.1648 0.2091 0.026 Uiso 1 1 calc R . .  
 H3A H 0.7512 -0.1079 0.2079 0.026 Uiso 1 1 calc R . .  
 C4 C 0.58771(10) -0.01639(7) 0.20066(4) 0.0191(2) Uani 1 1 d . . .  
 C5 C 0.64892(11) 0.07509(7) 0.20554(5) 0.0224(2) Uani 1 1 d . . .  
 H5 H 0.7360 0.0806 0.2229 0.027 Uiso 1 1 calc R . .  
 C6 C 0.58278(11) 0.15818(8) 0.18511(5) 0.0262(2) Uani 1 1 d . . .  
 H6 H 0.6251 0.2201 0.1883 0.031 Uiso 1 1 calc R . .  
 C7 C 0.45481(12) 0.15079(8) 0.16006(5) 0.0268(2) Uani 1 1 d . . .  
 H7 H 0.4097 0.2076 0.1463 0.032 Uiso 1 1 calc R . .  
 C8 C 0.39306(11) 0.06016(8) 0.15524(5) 0.0252(2) Uani 1 1 d . . .  
 H8 H 0.3058 0.0548 0.1381 0.030 Uiso 1 1 calc R . .  
 C9 C 0.45972(11) -0.02272(7) 0.17565(5) 0.0218(2) Uani 1 1 d . . .  
 H9 H 0.4171 -0.0845 0.1724 0.026 Uiso 1 1 calc R . .  
 C10 C 0.36309(10) -0.01622(7) 0.41256(4) 0.01572(18) Uani 1 1 d . . .  
 N11 N 0.24625(9) -0.01521(6) 0.44263(4) 0.02009(18) Uani 1 1 d . . .  
 C12 C 0.16817(11) -0.10441(8) 0.45102(5) 0.0249(2) Uani 1 1 d . . .  
 H12C H 0.0821 -0.0988 0.4299 0.037 Uiso 1 1 calc R . .  
 H12B H 0.1511 -0.1143 0.4935 0.037 Uiso 1 1 calc R . .  
 H12A H 0.2189 -0.1600 0.4353 0.037 Uiso 1 1 calc R . .  
 C13 C 0.17976(11) 0.07325(8) 0.46367(5) 0.0262(2) Uani 1 1 d . . .  
 H13C H 0.1833 0.0755 0.5072 0.039 Uiso 1 1 calc R . .  
 H13B H 0.0854 0.0732 0.4506 0.039 Uiso 1 1 calc R . .  
 H13A H 0.2259 0.1304 0.4473 0.039 Uiso 1 1 calc R . .  
 C14 C 0.44555(10) 0.07503(6) 0.40979(4) 0.01575(19) Uani 1 1 d . . .  
 C15 C 0.48967(10) 0.11261(7) 0.35529(4) 0.01779(19) Uani 1 1 d . . .  
 H15 H 0.4622 0.0830 0.3191 0.021 Uiso 1 1 calc R . .  
 C16 C 0.57415(10) 0.19376(7) 0.35446(5) 0.0214(2) Uani 1 1 d . . .  
 H16 H 0.6048 0.2191 0.3176 0.026 Uiso 1 1 calc R . .  
 C17 C 0.61386(11) 0.23791(7) 0.40734(5) 0.0239(2) Uani 1 1 d . . .  
 H17 H 0.6721 0.2929 0.4066 0.029 Uiso 1 1 calc R . .  
 C18 C 0.56808(11) 0.20134(7) 0.46122(5) 0.0237(2) Uani 1 1 d . . .  
 H18 H 0.5942 0.2320 0.4973 0.028 Uiso 1 1 calc R . .  
 C19 C 0.48423(10) 0.12015(7) 0.46280(5) 0.0197(2) Uani 1 1 d . . .  
 H19 H 0.4533 0.0954 0.4998 0.024 Uiso 1 1 calc R . .

loop\_

\_atom\_site\_aniso\_label  
 \_atom\_site\_aniso\_U\_11  
 \_atom\_site\_aniso\_U\_22  
 \_atom\_site\_aniso\_U\_33  
 \_atom\_site\_aniso\_U\_23  
 \_atom\_site\_aniso\_U\_13  
 \_atom\_site\_aniso\_U\_12

N1 0.0151(4) 0.0130(3) 0.0192(4) -0.0003(3) 0.0010(3) 0.0002(3)  
 O1 0.0163(3) 0.0256(4) 0.0225(4) -0.0007(3) -0.0028(3) 0.0019(3)  
 N2 0.0149(4) 0.0175(4) 0.0197(4) -0.0010(3) 0.0034(3) -0.0004(3)  
 O2 0.0151(3) 0.0229(3) 0.0219(4) -0.0005(3) 0.0047(3) 0.0013(3)  
 N3 0.0143(4) 0.0182(4) 0.0198(4) -0.0012(3) 0.0032(3) -0.0020(3)  
 C3 0.0232(5) 0.0203(4) 0.0211(5) -0.0013(3) 0.0072(4) 0.0033(4)  
 C4 0.0210(5) 0.0181(4) 0.0183(4) -0.0012(3) 0.0070(4) 0.0007(3)  
 C5 0.0190(5) 0.0228(5) 0.0254(5) -0.0011(4) 0.0026(4) -0.0034(4)  
 C6 0.0270(6) 0.0187(5) 0.0329(6) -0.0006(4) 0.0009(4) -0.0048(4)  
 C7 0.0272(6) 0.0195(5) 0.0338(6) 0.0007(4) 0.0010(4) 0.0009(4)  
 C8 0.0205(5) 0.0231(5) 0.0319(6) -0.0026(4) 0.0004(4) -0.0003(4)  
 C9 0.0217(5) 0.0179(4) 0.0258(5) -0.0029(4) 0.0055(4) -0.0028(4)  
 C10 0.0141(4) 0.0186(4) 0.0145(4) 0.0004(3) -0.0016(3) -0.0001(3)  
 N11 0.0155(4) 0.0223(4) 0.0225(4) -0.0017(3) 0.0037(3) 0.0003(3)  
 C12 0.0177(5) 0.0287(5) 0.0284(6) 0.0032(4) 0.0046(4) -0.0042(4)  
 C13 0.0192(5) 0.0308(5) 0.0285(6) -0.0055(4) 0.0045(4) 0.0061(4)  
 C14 0.0130(4) 0.0142(4) 0.0200(5) -0.0008(3) -0.0009(3) 0.0016(3)

C15 0.0174(4) 0.0165(4) 0.0194(4) -0.0008(3) 0.0000(4) 0.0024(3)  
C16 0.0196(5) 0.0167(4) 0.0279(5) 0.0029(4) 0.0040(4) 0.0017(3)  
C17 0.0203(5) 0.0149(4) 0.0364(6) -0.0012(4) -0.0015(4) -0.0003(4)  
C18 0.0243(5) 0.0176(4) 0.0293(5) -0.0043(4) -0.0071(4) 0.0010(4)  
C19 0.0206(5) 0.0179(4) 0.0205(5) -0.0012(3) -0.0026(4) 0.0027(4)

\_geom\_special\_details

;  
All esds (except the esd in the dihedral angle between two l.s. planes)  
are estimated using the full covariance matrix. The cell esds are taken  
into account individually in the estimation of esds in distances, angles  
and torsion angles; correlations between esds in cell parameters are only  
used when they are defined by crystal symmetry. An approximate (isotropic)  
treatment of cell esds is used for estimating esds involving l.s. planes.

;

loop\_

\_geom\_bond\_atom\_site\_label\_1  
\_geom\_bond\_atom\_site\_label\_2  
\_geom\_bond\_distance  
\_geom\_bond\_site\_symmetry\_2  
\_geom\_bond\_publ\_flag  
N1 O1 1.2574(11) . ?  
N1 N2 1.2782(12) . ?  
N1 N3 1.4120(11) . ?  
N2 O2 1.3911(10) . ?  
O2 C3 1.4542(12) . ?  
N3 C10 1.3202(12) . ?  
C3 C4 1.5073(14) . ?  
C3 H3B 0.9900 . ?  
C3 H3A 0.9900 . ?  
C4 C9 1.3908(15) . ?  
C4 C5 1.3986(13) . ?  
C5 C6 1.3931(15) . ?  
C5 H5 0.9500 . ?  
C6 C7 1.3919(16) . ?  
C6 H6 0.9500 . ?  
C7 C8 1.3903(15) . ?  
C7 H7 0.9500 . ?  
C8 C9 1.3931(15) . ?  
C8 H8 0.9500 . ?  
C9 H9 0.9500 . ?  
C10 N11 1.3414(12) . ?  
C10 C14 1.4967(13) . ?  
N11 C12 1.4603(13) . ?  
N11 C13 1.4602(13) . ?  
C12 H12C 0.9800 . ?  
C12 H12B 0.9800 . ?  
C12 H12A 0.9800 . ?  
C13 H13C 0.9800 . ?  
C13 H13B 0.9800 . ?  
C13 H13A 0.9800 . ?  
C14 C19 1.3970(13) . ?  
C14 C15 1.3999(14) . ?  
C15 C16 1.3935(13) . ?  
C15 H15 0.9500 . ?  
C16 C17 1.3916(15) . ?  
C16 H16 0.9500 . ?  
C17 C18 1.3879(16) . ?  
C17 H17 0.9500 . ?  
C18 C19 1.3905(14) . ?  
C18 H18 0.9500 . ?

C19 H19 0.9500 . ?

loop\_

\_geom\_angle\_atom\_site\_label\_1

\_geom\_angle\_atom\_site\_label\_2

\_geom\_angle\_atom\_site\_label\_3

\_geom\_angle

\_geom\_angle\_site\_symmetry\_1

\_geom\_angle\_site\_symmetry\_3

\_geom\_angle\_publ\_flag

O1 N1 N2 127.37(8) . . ?

O1 N1 N3 120.91(8) . . ?

N2 N1 N3 111.53(8) . . ?

N1 N2 O2 107.76(7) . . ?

N2 O2 C3 106.56(7) . . ?

C10 N3 N1 112.76(8) . . ?

O2 C3 C4 112.24(8) . . ?

O2 C3 H3B 109.2 . . ?

C4 C3 H3B 109.2 . . ?

O2 C3 H3A 109.2 . . ?

C4 C3 H3A 109.2 . . ?

H3B C3 H3A 107.9 . . ?

C9 C4 C5 118.92(9) . . ?

C9 C4 C3 120.67(9) . . ?

C5 C4 C3 120.39(9) . . ?

C6 C5 C4 120.30(10) . . ?

C6 C5 H5 119.8 . . ?

C4 C5 H5 119.8 . . ?

C7 C6 C5 120.19(9) . . ?

C7 C6 H6 119.9 . . ?

C5 C6 H6 119.9 . . ?

C8 C7 C6 119.87(10) . . ?

C8 C7 H7 120.1 . . ?

C6 C7 H7 120.1 . . ?

C7 C8 C9 119.72(10) . . ?

C7 C8 H8 120.1 . . ?

C9 C8 H8 120.1 . . ?

C4 C9 C8 121.00(9) . . ?

C4 C9 H9 119.5 . . ?

C8 C9 H9 119.5 . . ?

N3 C10 N11 117.00(8) . . ?

N3 C10 C14 124.02(8) . . ?

N11 C10 C14 118.95(8) . . ?

C10 N11 C12 120.94(8) . . ?

C10 N11 C13 124.18(8) . . ?

C12 N11 C13 114.56(8) . . ?

N11 C12 H12C 109.5 . . ?

N11 C12 H12B 109.5 . . ?

H12C C12 H12B 109.5 . . ?

N11 C12 H12A 109.5 . . ?

H12C C12 H12A 109.5 . . ?

H12B C12 H12A 109.5 . . ?

N11 C13 H13C 109.5 . . ?

N11 C13 H13B 109.5 . . ?

H13C C13 H13B 109.5 . . ?

N11 C13 H13A 109.5 . . ?

H13C C13 H13A 109.5 . . ?

H13B C13 H13A 109.5 . . ?

C19 C14 C15 119.88(9) . . ?

C19 C14 C10 119.02(8) . . ?

C15 C14 C10 121.02(8) . . ?

C16 C15 C14 119.60(9) . . ?

C16 C15 H15 120.2 . . ?  
 C14 C15 H15 120.2 . . ?  
 C15 C16 C17 120.42(10) . . ?  
 C15 C16 H16 119.8 . . ?  
 C17 C16 H16 119.8 . . ?  
 C18 C17 C16 119.76(9) . . ?  
 C18 C17 H17 120.1 . . ?  
 C16 C17 H17 120.1 . . ?  
 C17 C18 C19 120.50(10) . . ?  
 C17 C18 H18 119.8 . . ?  
 C19 C18 H18 119.8 . . ?  
 C18 C19 C14 119.82(9) . . ?  
 C18 C19 H19 120.1 . . ?  
 C14 C19 H19 120.1 . . ?

loop\_

\_geom\_torsion\_atom\_site\_label\_1  
 \_geom\_torsion\_atom\_site\_label\_2  
 \_geom\_torsion\_atom\_site\_label\_3  
 \_geom\_torsion\_atom\_site\_label\_4  
 \_geom\_torsion  
 \_geom\_torsion\_site\_symmetry\_1  
 \_geom\_torsion\_site\_symmetry\_2  
 \_geom\_torsion\_site\_symmetry\_3  
 \_geom\_torsion\_site\_symmetry\_4  
 \_geom\_torsion\_publ\_flag  
 O1 N1 N2 O2 -1.15(12) . . . . ?  
 N3 N1 N2 O2 -176.07(7) . . . . ?  
 N1 N2 O2 C3 -172.83(7) . . . . ?  
 O1 N1 N3 C10 71.02(11) . . . . ?  
 N2 N1 N3 C10 -113.68(9) . . . . ?  
 N2 O2 C3 C4 58.72(10) . . . . ?  
 O2 C3 C4 C9 -107.47(11) . . . . ?  
 O2 C3 C4 C5 70.84(12) . . . . ?  
 C9 C4 C5 C6 -0.56(15) . . . . ?  
 C3 C4 C5 C6 -178.89(10) . . . . ?  
 C4 C5 C6 C7 0.44(17) . . . . ?  
 C5 C6 C7 C8 -0.21(17) . . . . ?  
 C6 C7 C8 C9 0.11(17) . . . . ?  
 C5 C4 C9 C8 0.46(15) . . . . ?  
 C3 C4 C9 C8 178.78(9) . . . . ?  
 C7 C8 C9 C4 -0.23(16) . . . . ?  
 N1 N3 C10 N11 -172.48(8) . . . . ?  
 N1 N3 C10 C14 5.39(13) . . . . ?  
 N3 C10 N11 C12 3.41(14) . . . . ?  
 C14 C10 N11 C12 -174.58(9) . . . . ?  
 N3 C10 N11 C13 -169.76(9) . . . . ?  
 C14 C10 N11 C13 12.25(14) . . . . ?  
 N3 C10 C14 C19 -122.27(11) . . . . ?  
 N11 C10 C14 C19 55.57(12) . . . . ?  
 N3 C10 C14 C15 54.52(13) . . . . ?  
 N11 C10 C14 C15 -127.64(10) . . . . ?  
 C19 C14 C15 C16 1.26(14) . . . . ?  
 C10 C14 C15 C16 -175.50(9) . . . . ?  
 C14 C15 C16 C17 -0.51(14) . . . . ?  
 C15 C16 C17 C18 -0.53(15) . . . . ?  
 C16 C17 C18 C19 0.83(16) . . . . ?  
 C17 C18 C19 C14 -0.07(15) . . . . ?  
 C15 C14 C19 C18 -0.98(14) . . . . ?  
 C10 C14 C19 C18 175.85(9) . . . . ?

\_diffn\_measured\_fraction\_theta\_max 1.000

|                                     |        |
|-------------------------------------|--------|
| _diffn_refl_theta_full              | 29.17  |
| _diffn_measured_fraction_theta_full | 1.000  |
| _refine_diff_density_max            | 0.373  |
| _refine_diff_density_min            | -0.229 |
| _refine_diff_density_rms            | 0.042  |
